# Supplementary material for: Study of Pyrroloquinoline Quinine From Phosphate-Solubilizing Microbes Responsible for Plant Growth: In silico Approach
Source: Frontiers journal article supplement (doi:10.3389/fagro.2021.667339), 2021-06-04
Supplement: Data_Sheet_1.docx [file Data_Sheet_1.docx]

**Supplementary material**

**Study of Pyrroloquinoline quinine (PQQ) from Phosphate Solubilizing Microbes (PSM) responsible for Plant Growth: *In*-*silico* Approach**

Eeshita Bhanja1#, Renuka Das1#, Yasmin Begum2, 3#, Sunil Kanti Mondal1*

1Department of Biotechnology, The University of Burdwan, Golapbag, Burdwan -713104, West Bengal, India

2Department of Biophysics, Molecular Biology and Bioinformatics, University of Calcutta, 92, APC Road, Kolkata-700009, West Bengal, India

3Center of Excellence in Systems Biology and Biomedical Engineering (TEQIP Phase-III), University of Calcutta, JD-2, Sector III, Salt Lake, Kolkata-700106, West Bengal, India

#authors have equal contribution

*Corresponding author

**Introduction**

**Molecular mechanisms of phosphate soulubilzation of phosphate solubilizing bacteria (PSB)**

Zheng et al. (2017) investigated the molecular mechanisms of soluble phosphate effects on the growth and mineral phosphate solubilization of PSB strain *Burkholderia multivorans* WS-FJ9 at six levels of exogenous soluble phosphate (0, 0.5, 1, 5, 10, and 20 mM) via high-throughput sequencing. They identified 446 differentially expressed genes, among which 44 genes were continuously up-regulated when soluble phosphate concentration was increased and 81 genes were continuously down-regulated. Genes involved in glucose metabolism, including glycerate kinase, 2-oxoglutarate dehydrogenase, and sugar ABC-transporter, were continuously down-regulated, which indicates that metabolic channeling of glucose towards the phosphorylative pathway was negatively regulated by soluble phosphate (Zheng et al., 2017). Highly efficient phosphate-solubilizing bacteria (PSB) Burkholderiam ultivorans WS-FJ9 from pine tree rhizosphere solubilizes both organic and inorganic phosphate. The amount of solubilized inorganic phosphates by the WS-FJ9 strain is approximately 140mg/L. Using Next-Generation Sequencing (NGS) technology, Liu et al. (2020) observedthat *AP-2*, *gspE*, and *gspF* genes are related to organic phosphate, *hlyB* is related only to inorganic phosphate, and *phoR*, *phoA*, *AP-1*, and *AP-3* are related to both. *GspE*, *GspF* and *HlyB* gene are related to the secretion system responsible for secreting organic acids and enzymes into the environment. *PhoR* gene responsible for sensing the two-component system of external phosphate sources, which can sense the concentration of soluble phosphate in the outside world; *PhoA* gene encode alkaline phosphatase, which can mineralize the activity of organic acids; *AP-1*, *AP-2* and *AP-3* encode the acid phosphatase gene and are important enzymes regulating phosphorus metabolism (Liu et al., 2020). The expressions of Pyrroloquinoline quinone-glucose dehydrogenase gene *gcd* (pg5SD2) in *Pseudomonas frederiksbergensis* JW-SD2 were repressed gradually with the increase of concentration of soluble phosphate (Zheng et al., 2016). In the insoluble P medium (hydroxyapatite, IPi medium), the expression of 68 genes was up-regulated, whereas 100 genes were down-regulated in a nitrogen-fixing bacterium *Paenibacillus sonchi* genomovar Riograndensis SBR5 (Brito et al., 2020). Under IPi condition, the down-regulation of the 2-oxoglutarate dehydrogenase (2-OGDH) complex genes *odhAB*, related to central carbon metabolism could have caused a change in the metabolic flux from the TCA cycle intermediate 2-oxoglutarate to proline. SBR5 was able to solubilize hydroxyapatite, which suggests that this organism is a promising PSB (Brito et al., 2020). The expression of *phoD* gene encoding alkaline phosphatase, *pqq* and *ppk* gene encoding polyphosphate kinases (PPK) were up-regulated in *Acinetobacter pittii* gp-1 strain added soils (Wan et al., 2020). The transformation of insoluble tricalcium phosphate into soluble phosphorus involved with a strong expression of *pqq* gene and an increasing expression level of *ppk* gene was closely correlated with the content of extracellular P (Wan et al., 2020).

***pqq* genes**

PqqA, 22 amino acid peptide containing conserved Glutamic acid (Glu) and Tyrosine (Tyr); side-direct mutagenesis identified these two residues on PqqA as a provider of carbon and nitrogen atoms required for PQQ synthesis (Goosen et al., 1987). Barr et al., (2016) reported carbon-carbon bond formation between Glu15 and Tyr19 side chain within the precursor peptide PqqA in the presence of PqqE and peptide chaperone PqqD. PqqB belongs to a small subclass of metallo-β-lactamase (MBL) superfamily contains metal-binding motif (Tu et al., 2017). The *pqqB* gene is indirectly involved in transport of PQQ from the cytoplasm to the periplasm (Wan et al., 2017). Wan et al. (2017) have reported that the proteins encoded by PqqB, B932_1930 (a transporter) and B932_2186 (an ABC transporter permease) enhances PQQ secretion in *Gluconobacter oxydans*.The *pqqB* gene was up-regulated in *Gluconobater oxydans* NL71 while fermenting xylose into xylunate and the fermentation inhibitor furfural was added (Miao et. al, 2017). The *pqq*C gene is essential for antifungal activity of *P. kilonensis* JX22 against *F. oxysporum* *f.* sp. *lycopersici* (Xu et al., 2014). PqqD is a member of the structurally conserved RREs {post-translationally modified peptide (RiPP) precursor peptide recognition element (RRE)}. Both NMR structure of *Methylobacterium extorquens* PqqD, as well as results from 1H,15N-HSQC binding experiments identify the PqqD residues involved in binding the precursor peptide, PqqA, and the enzyme, PqqE (Evens et al., 2017). PqqE from *M. extorquens* AM1 is oxygen-tolerant; efficiently expressed in *Escherichia coli* cells grown aerobically and affinity-purified to near homogeneity (Saichana et al., 2016). The enzyme may serve as a convenient tool for studying the molecular mechanism of PQQ biosynthesis. PqqF is a putative M16 metalloprotease, which contains four zinc binding motifs (Wei et al., 2016). Prodigiosin is a secondary metabolite produced by *Serratia marcescens*, actinomycete, and other Gram-negative bacteria. Wei et al. (2016) demonstrated that the *pqqF* gene is essential for PQQ biosynthesis as deletion of *pqqF* abolished the inhibition of prodigiosin production by glucose. The *pqqG* gene encodes a putative peptidase, located downstream of pqqE in several *Pseudomonas* species (An and Moe et al., 2016).

**Results and discussion**

**Multiple Sequence Alignment**

MSA methods refer to a series of algorithmic solutions for aligning three or more homologous biological sequences (DNA, RNA, or Protein) considering evolutionary events (mutations, insertions, deletions, etc.) gradually. Multiple sequence alignment was performed to study amino acid conservation at PqqA, PqqB, PqqC, PqqD, and PqqE protein sequences.

In the Jalview representation, corresponding height of the different amino acid residues in the sequence logo further, the color conservation at the different sites, disclose a few variations in the PQQ encoding genes, suggesting the level of conservation of amino acids. In contrast to the fully conserved amino acid sites, the non- or semi-conserved sites are more beneficial for providing information for evolutionary study. The amino acid pattern present in the non/semi conserved sites gathers quite useful facts on the possible places of changes or mutations (**Supplementary Table S3**) that occurred in these sequences during evolution, accentuate differences in the organization of the identified proteins in different clades, as evidenced in the phylogenetic analyses (**Figure 3**).

From the Jalview representation, we have observed many non-conserved amino acids present in the PqqA. Depending upon that, we have detected several mutable sites as follows with a positive impression over the phylogenetic tree. Site 2 in the aligned condition was occupied by amino acids Serine and Threonine. Serratia, Cronobacter, Rouxiella have possessed Threonine. *Mixta* possesses Serine at this site. Serine and Threonine both are neutral, polar, and hydrophilic in nature. Therefore, at this site, a silent mutation has occurred. Effect of mutation observed on the phylogenetic tree. Site 3 holds amino acid Threonine, Lysine, and Alanine. Serratia and Rouxiella were occupied by the amino acid Threonine. *Cronobacter* possesses Lysine. Only *Mixta* possesses Alanine. Alanine is non-polar, hydrophobic, while Lysine and Threonine are polar and hydrophilic. Alanine and Threonine are neutral, while Lysine is basic. Considering this, a mutation occurred at that site, and phylogenetic impact was observed. Likewise, site 10 was almost occupied with amino acid Valine by *Serratia*, *Kosakonia*, *Cronobacter*, *Nissabacter*, *Erwinia*, *Rouxiella*, and *Pantoea*. *Mixta* and *Rahnella* possess amino acid Glutamic acid, while *Klebsiella* possesses Isoleucine. Valine and Isoleucine are neutral, hydrophobic whereas Glutamic acid is acidic and hydrophilic. Even while mutation occurs at this site but lacks any impact on phylogeny. Site 12 was occupied by the amino acid Leucine. Only Pantoea agglomerans possess with amino acid Methionine. Leucine and Methionine both are neutral, non-polar, and hydrophobic; therefore, a silent mutation occurred at this site with no positive phylogeny impact. Just as in PqqB, a kind of similarity was noticed for the mutable sites from the Jalview representation too. At site 193, *Serratia* possesses Glycine. Kosakonia, Cronobacter, Mixta, Nissabacter, Rahnella possess Serine and *Pantoea*, and Klebsiella possesses Threonine at this site. Serine and Threonine both are neutral, polar, hydrophilic but Glycine which has not possess any hydrophobicity or hydrophilicity, is neutral, a non-polar special type of amino acid. Although, a mutation occurred at this site, and the phylogeny impact was notable. Site 136 was occupied by Valine, Isoleucine, and Glutamine. Kosakonia, Rahnella, Pantoea possess Glutamine. Serratia, Cronobacter, Nissabacter, Erwinia, *Klebsiella aerogenes* possess Isoleucine, and other Klebsiella species possesses Valine. Isoleucine, Valine and Glutamine all are neutral but Valine and Isoleucine are non-polar, hydrophobic. Glutamine is polar, hydrophilic. Even while mutation occurred at this site but no phylogenetic impact was observed. Site 159 was almost occupied by amino acid Isoleucine. Only *Klebsiella* holds the amino acid, Valine. Isoleucine and Valine are neutral and non-polar, hydrophobic. Considering this, a silent mutation occurs at this site, and phylogenetic impact observed. Site 138 of alignment was almost occupied by Histidine and Arginine. Only the Pantoea genus possess with amino acid Arginine. Histidine and Arginine are basic, polar, and hydrophilic. That is why silent mutation occurred with no evidence of phylogenic impact. By the same token in the conserved domain in PqqC, some inequalities were noted in the event of mutation at different mutable sites. Site 178 holds amino acids Aspartic acid, Histidine, Phenylalanine, Glycine. Nissabacter, Erwinia, Rahnella possess with amino acid Glycine. Serratia, Kosakonia, Cronobacter, Mixta possess Aspartic acid. Only Rouxiella was occupied by Histidine. Pantoea and Klebsiella possess Phenylalanine. Phenylalanine and Glycine both are neutral, non-polar. Phenylalanine is hydrophobic and Aspartic acid and Histidine are hydrophilic. Therefore, a mutation occurred at this site with a positive phylogeny impact. At site 93, only Kosakonia was occupied by Glutamic acid. Only Rouxiella possess Aspartic acid. The rest of the selected organisms possess Glycine. Glutamic acid and Aspartic acid are acidic, polar and hydrophilic but Glycine is neutral, non-polar. Although a mutation occurred at this site, no phylogeny impact is notable. Site 164 was almost occupied by amino acid Serine. Only *Rahnella* hold the amino acid Threonine. Serine and Threonine, both are neutral, polar and hydrophilic. Considering this, a mutation occurs at this site, and phylogenetic impact was observed. Likewise, site 134 almost occupied by amino acid Asparagine with Serratia, Kosakonia, Cronobacter, Rahnella, Pantoea, and Klebsiella. Pantoea ananatis and Erwinia possess Serine. Asparagine and Serine, both are neutral, polar and hydrophilic. Therefore, a silent mutation occurred at this site with a negative phylogeny impact. PqqD manifests some mutable sites in Jalview representation too. Site 60 was reserved with amino acids Aspartic acid and Alanine. Cronobacter, Rahnella, Rouxiella possess with Aspartic acid. The remaining selected organisms possess Alanine. Alanine is neutral, non-polar and hydrophobic but Aspartic acid is acidic, polar, and hydrophilic. Hence, a mutation occurs at this site, but no phylogeny impact is observed. In contrast, at site 68 Serratia and Mixta filled up with Glycine. Kosakonia, Erwinia, Nissabacter possess Aspartic acid. Cronobacter, Rahnella,  Pantoea, and Klebsiella are occupied by Glutamic acid. Glycine is neutral, non-polar, on the other hand, Aspartic acid and Glutamic acid are acidic, polar, hydrophilic. Considering this, a mutation occurs at this site, and phylogenetic impact was observed on *Serratia* and *Mixta*. Site 72 mostly occupied by the amino acid Valine. Serratia, Mixta, Cronobacter, Kosakonia were occupied by amino acid Leucine. Leucine and Valine are neutral, non-polar, and hydrophobic. Considering this, a silent mutation occurred at this site, and phylogenetic impact was noticed. Site 80 in the aligned condition was occupied by amino acids Phenylalanine and Leucine. Serratia, Nissabacter, Mixta, Rahnella, and Erwinia have possessed Phenylalanine. Kosakonia, Pantoea, Cronobacter, and Klebsiella possess Leucine at this site. Phenylalanine and Leucine are neutral, non-polar and hydrophobic. Therefore, at this site, a silent mutation has occurred with no phylogeny impact. In PqqE, kind of similarities noticed for the mutable sites from the Jalview representation as well. Site 335 was almost occupied by the amino acid Phenylalanine. Serratia occupied by Tyrosine. Phenylalanine and Tyrosine both are neutral other than Tyrosine that is polar but Phenylalanine is non-polar and both are hydrophobic in nature. Considering this, a mutation occurred at this site, and phylogenetic impact was observed. Site 364 hold amino acids Lysine and Threonine. Serratia, Kosakonia, Cronobacter, and Pantoea dispersa possess the amino acid Threonine. The rest of the organisms possess Lysine. Threonine is neutral; on the other hand, Lysine is basic. Both amino acids are polar and hydrophilic. Even while mutation occurred at this site, but no phylogenetic impact was observed. In contrast, site 273 was almost occupied by amino acid Leucine. Serratia filled up with Methionine. Leucine and Methionine both are neutral, non-polar, and hydrophobic. The silent mutation occurred at this site, and the phylogenetic impact was notable. Site 375 of alignment was almost occupied by Serine and Threonine. Cronobacter, Mixta, Rahnella, and Rouxiella possess with amino acid Threonine. Serratia, Kosakonia, Pantoea, and Klebsiella possess with Serine. Serine and Threonine are neutral, polar, and hydrophilic. That is why silent mutation occurred with no evidence of phylogenic impact. These above-mentioned outcomes substantiate the evolutionary relationship of the PQQ protein from selected organisms as acquired in the phylogenetic tree.

**References**

An, R., and Moe, L. A. (2016). Regulation of pyrroloquinoline quinone-dependent glucose dehydrogenase activity in the model rhizosphere-dwelling bacterium *Pseudomonas putida* KT2440. *Applied Environ Microbiol*. 82 (16), 4955-4964. doi: 10.1128/AEM.00813-16

Evans, R. L., 3rd, Latham, J. A., Xia, Y., Klinman, J. P., and Wilmot, C. M. (2017). Nuclear magnetic resonance structure and binding studies of PqqD, a chaperone required in the biosynthesis of the bacterial dehydrogenase cofactor Pyrroloquinoline Quinone. *Biochem*, 56 (21), 2735-2746. doi: 1021/acs.biochem.7b00247

Miao, Y., Shen, Y., and Xu, Y. (2017). Effects of inhibitors on the transcriptional profiling of *Gluconobater oxydans* NL71 genes after biooxidation of xylose into xylonate. *Front Microbiol*, 8, 716. doi: 10.3389/fmicb.2017.00716

Saichana, N., Tanizawa, K., Pechoušek, J., Novák, P., Yakushi, T., Toyama, H., & Frébortová, J. (2016). PqqE from *Methylobacterium extorquens* AM1: a radical S-adenosyl-l-methionine enzyme with an unusual tolerance to oxygen. J Biochem, 159 (1), 87-99. doi: 10.1093/jb/mvv073

Tu, X., Latham, J. A., Klema, V. J., Evans, R. L., 3rd, Li, C., Klinman, J. P., and Wilmot, C. M. (2017). Crystal structures reveal metal-binding plasticity at the metallo-β-lactamase active site of PqqB from *Pseudomonas putida*. *J Biol Inorg Chem*, 22 (7), 1089-1097. doi:10.1007/s00775-017-1486-8

Wan, H., Xia, Y., Li, J., Kang, Z and Zhou J. (2017). Identification of transporter proteins for PQQ-secretion pathway by transcriptions and proteomics analysis in *Gluconobacter oxydans* WSH-003. *Front Chem Sci Eng*, 11 (1), 72-88. doi: 10.1007/s11705-016-1580-4

Wei, Q., Ran, T., Ma, C., He, J., Xu, D., and Wang, W. (2016). Crystal structure and function of PqqF protein in the Pyrroloquinoline Quinone biosynthetic pathway. *J Biol Chem*, 291 (30), 15575-15587. doi:10.1074/jbc.M115.711226

Xu, J., Deng, P., Showmaker, K. C., Wang, H., Baird, S. M., and Lu, S. E. (2014). The *pqq*C gene is essential for antifungal activity of *Pseudomonas kilonensis* JX22 against *Fusarium oxysporum* f. sp. lycopersici. *FEMS Microbiol Lett*. 353 (2), 98-105. doi: 10.1111/1574-6968.12411
