# Supplementary material for: Study of Pyrroloquinoline Quinine From Phosphate-Solubilizing Microbes Responsible for Plant Growth: In silico Approach
Source: Frontiers journal article supplement (doi:10.3389/fagro.2021.667339), 2021-06-04
Supplement: Data_Sheet_7.xls [file Data_Sheet_7.xls]

## Sheet: Amino Acid frequency AVG(STDEV)
			Average and standard deviation of amino acid frequencies of the PQQ pathway associated genes from selected gammaproteobacteria.
			D	E	H	K	R	F	Y	W	P	M	G	A	V	I	L	C	Q	N	S	T	TOT
	PqqA	Cronobacter	4(0)	4(0)	0(0)	8(0)	8(0)	4(0)	4(0)	4(0)	4(0)	4(0)	4(0)	4(0)	8(0)	4(0)	16(0)	0(0)	0(0)	4(0)	4(0)	12(0)	25(0)
		Klebsiella	4.348(0.001)	4.348(0.001)	0(0)	8.696(0.001)	8.696(0.001)	4.348(0.001)	4.348(0.001)	4.348(0.001)	4.348(0.001)	4.348(0.001)	4.348(0.001)	4.348(0.001)	4.348(0.001)	8.696(0.001)	17.392(0.001)	0(0)	0(0)	4.348(0.001)	4.348(0.001)	4.348(0.001)	23(0)
		Kosakonia	4.348(0)	4.348(0)	0(0)	4.348(0)	8.696(0)	4.348(0)	4.348(0)	4.348(0)	4.348(0)	5.218(1.945)	4.348(0)	0(0)	8.696(0)	4.348(0)	16.522(1.945)	0(0)	0(0)	4.348(0)	4.348(0)	13.044(0)	23(0)
		Pantoea	4.348(0.001)	5.435(1.967)	0(0)	8.696(0.001)	8.696(0.001)	4.348(0.001)	4.348(0.001)	4.348(0.001)	4.348(0.001)	6.16(2.239)	4.348(0.001)	0.363(1.256)	8.334(1.256)	4.711(1.256)	15.58(2.239)	0(0)	0(0)	4.348(0.001)	4.348(0.001)	7.247(2.141)	23(0)
		Rahnella	4.348(0)	8.696(0)	0(0)	4.348(0)	8.696(0)	4.348(0)	4.348(0)	4.348(0)	4.348(0)	4.348(0)	4.348(0)	0(0)	4.348(0)	4.348(0)	17.392(0.001)	0(0)	0(0)	4.348(0)	8.696(0)	8.696(0)	23(0)
		Serratia	4(0)	8(0)	0(0)	4(0)	8(0)	4(0)	4(0)	4(0)	4(0)	4(0)	4(0)	0(0)	8(0)	4(0)	16(0)	0(0)	0(0)	4(0)	4(0)	16(0)	25(0)
	PqqB	Cronobacter	4.636(0)	5.166(0.297)	5.232(0.149)	1.987(0)	4.305(0)	1.987(0)	0.994(0)	1.987(0)	7.616(0.001)	1.656(0)	9.868(0.149)	8.146(0.182)	5.696(0.149)	6.226(0.149)	12.583(0)	2.981(0)	3.312(0)	5.696(0.149)	5.961(0)	3.974(0.001)	302(0)
		Klebsiella	5.695(0.207)	3.883(0.082)	3.893(0.208)	1.942(0.283)	4.316(0.283)	2.651(0.129)	0.926(0.116)	2.277(0.009)	7.331(0.193)	1.951(0.007)	9.371(0.138)	7.921(0.339)	4.523(0.137)	6.711(0.285)	10.357(0.272)	2.877(0.109)	6.65(0.372)	5.441(0.393)	4.898(0.363)	6.395(0.183)	307.546(1.093)
		Kosakonia	4.621(0)	4.621(0)	3.631(0)	1.321(0.234)	4.621(0)	1.981(0.001)	0.991(0.001)	2.311(0)	7.921(0.001)	1.981(0.001)	8.911(0)	8.713(0.181)	4.357(0.148)	5.941(0)	12.212(0)	2.641(0)	5.281(0.234)	5.281(0)	7.657(0.148)	5.017(0.148)	303(0)
		Pantoea	5.203(0.487)	3.922(0.192)	3.678(0.402)	2.342(0.36)	3.623(0.299)	2.56(0.183)	1.09(0.257)	2.206(0.145)	7.137(0.526)	1.743(0.152)	9.288(0.358)	7.541(0.776)	4.412(0.6)	7.518(0.687)	11.902(0.172)	2.615(0.013)	6.264(0.11)	5.284(0.246)	5.199(0.746)	6.482(0.303)	306(1.478)
		Rahnella	4.951(0.001)	5.281(0)	3.961(0)	3.631(0)	3.466(0.181)	1.981(0)	0.991(0)	2.311(0.001)	5.886(0.135)	1.651(0)	8.911(0)	7.261(0)	3.631(0)	7.591(0.001)	11.937(0.135)	3.301(0)	4.291(0)	5.941(0)	5.776(0.181)	7.261(0)	303(0)
		Serratia	6.014(0.146)	4.548(0.146)	4.401(0.166)	1.504(0.174)	5.538(0.321)	1.981(0)	0.991(0)	2.311(0.001)	7.591(0.001)	1.651(0.001)	9.241(0.001)	8.435(0.374)	5.538(0.276)	5.721(0.234)	11.882(0.001)	3.007(0.111)	2.127(0.174)	6.785(0.24)	5.758(0.335)	4.988(0.258)	303(0)
	PqqC	Cronobacter	4.781(0)	8.765(0)	4.781(0)	1.594(0)	9.562(0)	3.188(0)	4.781(0)	3.188(0)	3.586(0)	3.108(0.179)	4.861(0.179)	10.757(0)	4.781(0)	4.781(0)	9.642(0.179)	1.514(0.179)	5.18(0)	2.232(0.219)	4.542(0.219)	4.383(0)	251(0)
		Klebsiella	6.061(0.571)	5.808(0.638)	5.192(0.07)	3.188(0.001)	7.582(0.07)	3.538(0.133)	4.443(0.146)	3.188(0.001)	4.045(0.146)	2.789(0.001)	4.781(0.001)	11.699(0.637)	3.647(0.146)	4.83(0.133)	9.84(0.291)	1.534(0.146)	5.759(0.436)	2.56(0.412)	4.878(0.2)	4.649(0.515)	251(0)
		Kosakonia	4.941(0.219)	8.128(0.219)	5.1(0.179)	1.594(0)	8.367(0)	2.789(0)	4.383(0)	3.586(0)	3.985(0.001)	2.789(0)	5.18(0)	10.837(0.179)	4.781(0)	4.781(0)	9.562(0)	1.993(0.001)	6.056(0.179)	1.674(0.179)	5.1(0.179)	4.383(0)	251(0)
		Pantoea	4.947(0.495)	6.807(0.397)	4.748(0.116)	2.723(0.286)	7.006(0.267)	3.619(0.116)	4.516(0.26)	3.188(0)	4.449(0.286)	2.756(0.116)	4.981(0.209)	11.222(0.533)	4.184(0.625)	5.113(0.231)	9.695(0.26)	0.897(0.181)	6.541(0.206)	3.022(0.495)	4.051(0.738)	5.545(0.858)	251(0)
		Rahnella	4.673(0.192)	7.107(0.118)	4.409(0.162)	2.699(0.176)	7.698(0.315)	3.159(0.053)	4.738(0.079)	3.159(0.053)	3.881(0.102)	3.156(0.215)	5.792(0.354)	10.331(0.209)	5.133(0.085)	4.344(0.072)	9.476(0.157)	1.185(0.02)	7.238(0.319)	2.892(0.519)	4.929(0.415)	4.009(0.481)	253.334(4.083)
		Serratia	5.401(0.21)	5.401(0.29)	4.383(0.001)	1.993(0)	7.792(0.21)	2.789(0)	5.18(0)	3.188(0)	5.224(0.133)	2.789(0)	5.578(0)	11.687(0.2)	4.781(0)	4.781(0)	9.739(0.21)	1.594(0)	6.818(0.312)	2.878(0.176)	4.339(0.24)	3.675(0.176)	251(0)
	PqqD	Cronobacter	4.348(0)	8.696(0)	3.261(0)	2.174(0)	6.522(0)	4.348(0)	3.261(0)	2.174(0)	5.435(0)	2.174(0)	6.74(0.487)	11.74(0.487)	4.348(0)	6.522(0)	10.87(0)	0(0)	9.783(0)	2.174(0)	1.087(0)	4.348(0)	92(0)
		Klebsiella	5.765(0.576)	10.244(0.903)	1.087(0.001)	3.426(0.396)	7.445(0.396)	3.327(0.54)	2.471(0.492)	2.174(0.001)	3.261(0.001)	2.998(0.474)	5.435(0.001)	13.736(0.935)	6.555(1.07)	8.762(1.015)	7.609(0.001)	1.812(0.8)	6.687(0.396)	2.207(0.19)	2.076(0.318)	2.932(0.792)	92(0)
		Kosakonia	6.087(0.596)	9.131(0.596)	4.131(0.487)	3.261(0)	5.435(0)	4.131(0.487)	3.479(0.487)	2.174(0)	3.261(0)	2.174(0)	4.348(0)	16.522(0.487)	5.218(0.487)	8.696(0)	8.696(0)	1.305(0.487)	5.435(0)	1.305(0.487)	3.044(0.487)	2.174(0)	92(0)
		Pantoea	5.979(1.087)	9.602(1.019)	1.359(0.492)	4.077(0.942)	5.526(0.314)	3.986(0.536)	2.899(0.536)	2.174(0.001)	3.714(0.727)	2.99(0.492)	6.25(0.492)	15.49(1.322)	6.341(1.454)	6.613(0.727)	7.519(0.862)	0.363(0.536)	6.432(0.314)	3.08(0.908)	2.537(0.708)	3.08(0.781)	92(0)
		Rahnella	7.513(0.354)	7.317(0.127)	3.024(0.329)	4.294(0.203)	6.44(0.304)	7.513(0.354)	3.024(0.329)	1.074(0.051)	4.098(0.279)	4.098(0.279)	5.367(0.253)	9.66(0.456)	4.294(0.203)	8.195(0.557)	5.367(0.253)	1.074(0.051)	5.367(0.253)	4.294(0.203)	1.074(0.051)	6.925(1.087)	93.334(4.083)
		Serratia	5.556(0.363)	6.16(0.544)	3.02(0.48)	2.174(0)	6.522(0.001)	5.435(0)	3.261(0.001)	2.174(0)	4.469(0.363)	2.174(0)	6.522(0.001)	10.025(0.48)	6.522(0.001)	4.348(0)	10.87(0)	0(0)	7.488(0.363)	5.677(0.48)	2.174(0)	5.435(0)	92(0)
	PqqE	Cronobacter	5.239(0.119)	6.614(0.001)	2.646(0)	3.969(0.001)	5.662(0.145)	4.762(0)	2.646(0)	1.588(0)	5.821(0)	2.646(0)	6.932(0.119)	10.847(0)	3.969(0.001)	4.498(0)	10.318(0)	2.911(0)	5.292(0)	4.498(0)	4.339(0.237)	4.815(0.119)	378(0)
		Klebsiella	5.567(0.265)	6.962(0.31)	1.898(0.11)	4.506(0.11)	6.603(0.212)	4.809(0.12)	3.087(0.12)	1.579(0.001)	5.256(0.046)	2.146(0.096)	5.782(0.046)	9.235(0.325)	4.171(0.096)	4.291(0.192)	10.71(0.192)	3.422(0.001)	5.71(0.155)	3.669(0.336)	6.356(0.337)	4.251(0.22)	380(0)
		Kosakonia	4.245(0)	7.162(0)	3.184(0)	3.714(0.001)	5.836(0)	4.245(0)	2.918(0)	1.592(0)	5.571(0)	2.388(0)	7.162(0)	10.398(0.222)	4.722(0.222)	4.245(0)	10.876(0)	2.918(0)	4.775(0)	4.298(0.119)	6.154(0.222)	3.608(0.303)	377(0)
		Pantoea	6.141(0.413)	6.603(0.471)	2.164(0.153)	4.81(0.184)	6.164(0.184)	4.591(0.261)	3.125(0.222)	1.574(0.013)	5.619(0.158)	2.099(0.018)	6.534(0.313)	8.001(0.425)	3.761(0.182)	4.962(0.215)	10.383(0.167)	3.411(0.028)	5.464(0.355)	4.198(0.268)	5.572(0.522)	4.835(0.698)	381.25(3.166)
		Rahnella	4.687(0.085)	7.551(0.137)	2.084(0.038)	5.682(0.094)	4.99(0.06)	4.948(0.09)	2.604(0.047)	1.563(0.029)	5.162(0.103)	2.428(0.174)	6.942(0.084)	9.634(0.174)	4.208(0.149)	5.25(0.061)	10.412(0.216)	3.125(0.057)	5.208(0.094)	5.208(0.094)	4.376(0.394)	3.948(0.061)	384.167(6.998)
		Serratia	4.939(0.23)	6.203(0.14)	2.675(0.089)	3.704(0.23)	6.291(0.258)	4.498(0)	3.175(0)	1.588(0.001)	5.468(0.133)	2.646(0.001)	7.408(0.001)	11.582(0.177)	3.734(0.089)	4.998(0.089)	10.318(0)	2.999(0.133)	5.527(0.159)	3.675(0.159)	4.233(0)	4.351(0.14)	378(0)
